# Supplementary material for: Assessing rejection-related disease in kidney transplant biopsies based on archetypal analysis of molecular phenotypes
Source: JCI journal article supplement (doi:10.1172/jci.insight.94197), 2017-06-14
Supplement: sd1 [file 1]

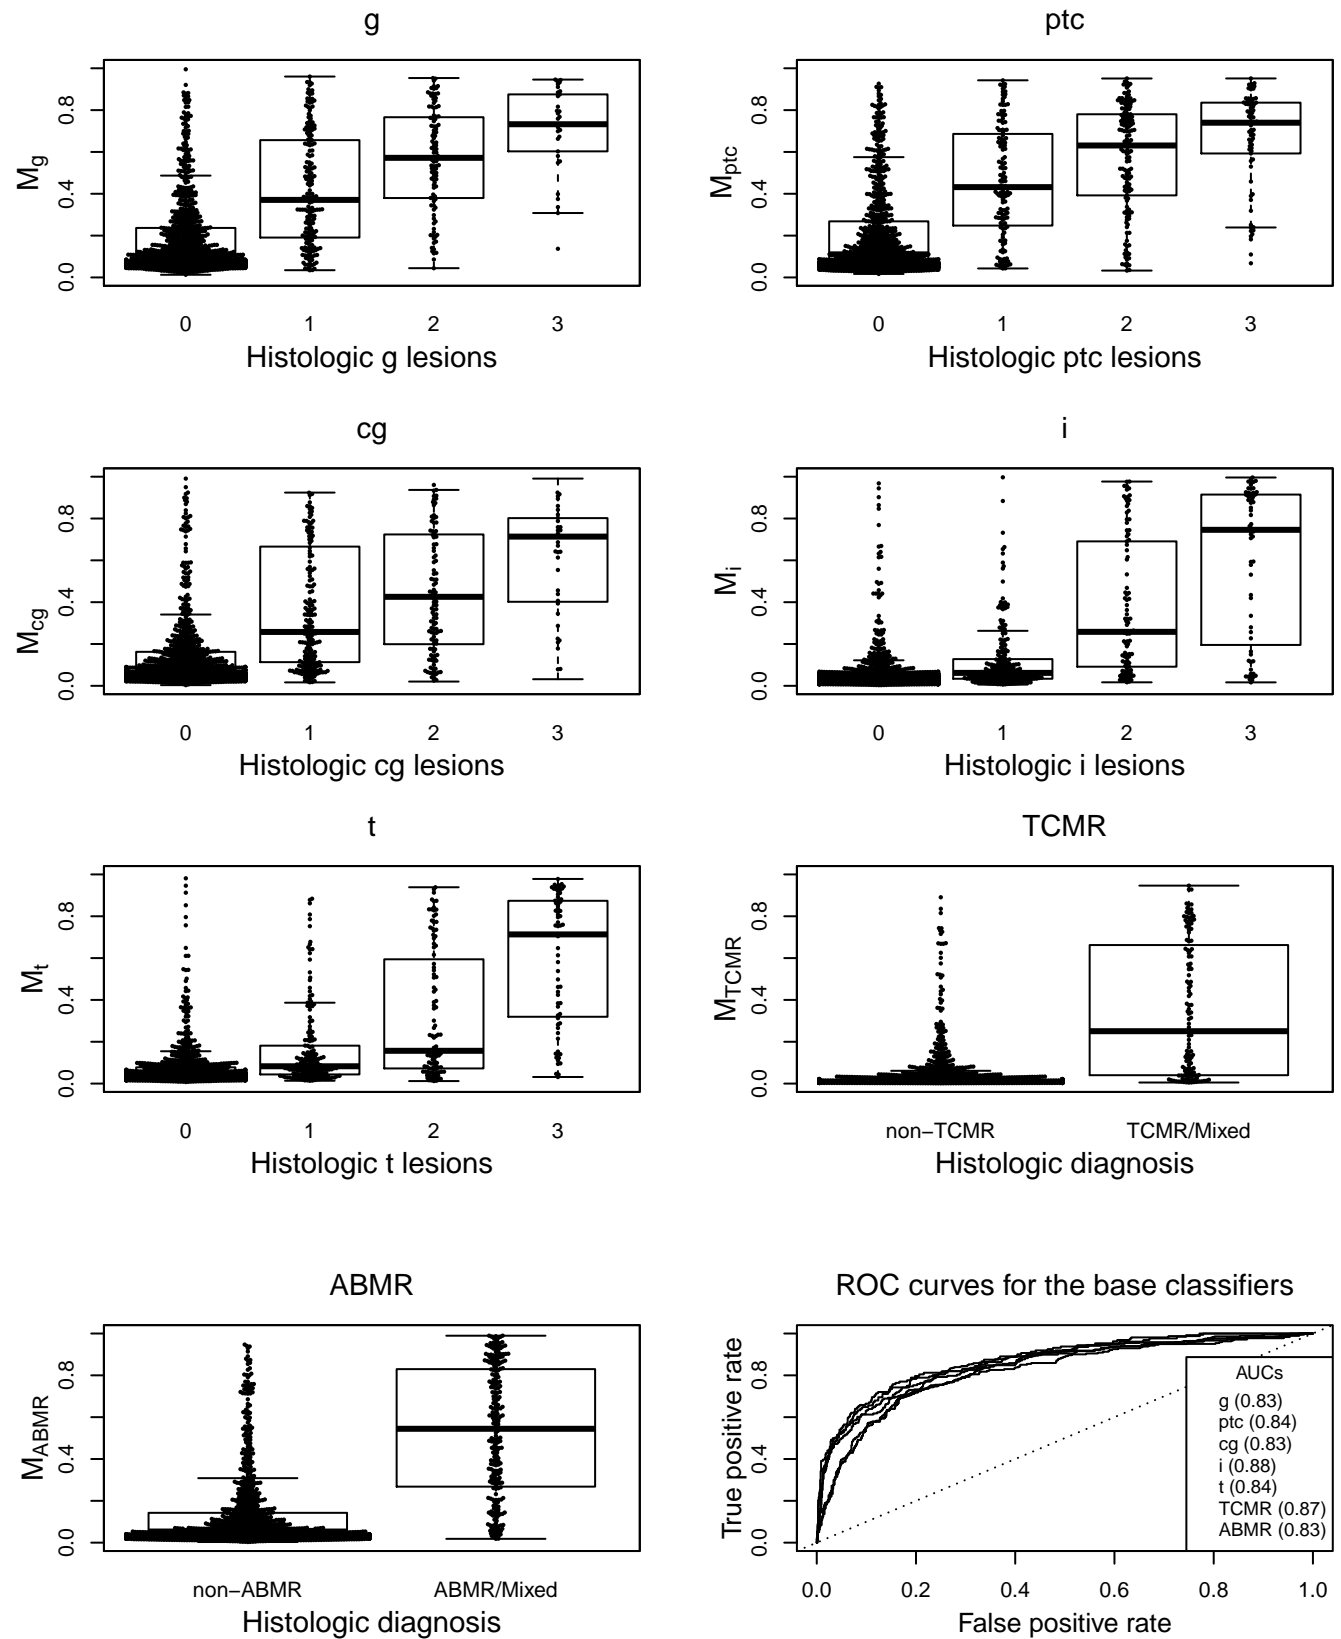

**Supplementary Figure 1.** Concordance between the seven base classifiers and the histologic data. Each dot represents a molecular score for a biopsy sample. Boxes represent the interquartile range (IQR), heavy horizontal bars are the medians, and whiskers are the most extreme data points which are no more than 1.5 IQRs from the IRQ box. AUC = area under the receiver operating characteristic curve. Abbreviations: M – Molecular classifier scores; TCMR – T cell-mediated rejection; ABMR – antibody-mediated rejection; g – glomerulitis; ptc – peritubular capillaritis; i – interstitial inflammation; t – tubulitis; cg – transplant glomerulopathy; ROC – receiver operating characteristic

| <b>Supplementary Acknowledgements – Participating Centers</b> |                                      |                    |              |
|---------------------------------------------------------------|--------------------------------------|--------------------|--------------|
| <b>Center</b>                                                 | <b>Principal investigators</b>       | <b>Local IRB #</b> | <b>TOTAL</b> |
| <b>Barcelona</b>                                              | Daniel Serón and Joana Sellarés      | PR(AG)164-2010     | 60           |
| <b>Bronx, NY, USA</b>                                         | Enver Akalin                         | 09-06-174          | 30           |
| <b>Manchester, UK</b>                                         | Declan de Freitas and Michael Picton | 10/H1008/126       | 39           |
| <b>Baltimore, MD, USA</b>                                     | Jonathan Bromberg and Matt Weir      | HCR-HP-00061790-2  | 50           |
| <b>Medical School of Hannover</b>                             | Gunilla Einecke                      | 5786               | 63           |
| <b>Necker - France</b>                                        | Alexandre Loupy and Olivier Aubert   | DC-2009-955        | 86           |
| <b>Saint Louis - France</b>                                   | Carmen Lefaucheur and Clement Gosset | DC-2009-955        | 88           |
| <b>St Louis, MO, USA</b>                                      | Daniel Brennan and Andrew Malone     | 20150471           | 17           |
| <b>The Hennepin County Medical Center</b>                     | Bertram Kasiske                      | HSR-06-2670        | 6            |
| <b>The University of Alberta</b>                              | Philip F Halloran                    | Pro00022226        | 487          |
| <b>The University of Minnesota at Fairview</b>                | Arthur Matas                         | HSC-0606M87646     | 76           |
| <b>Vienna, Austria</b>                                        | Georg A. Böhmig and Farsad Eskandary | EK1506/2015        | 120          |
| <b>Virginia-VCU</b>                                           | Gaurav Gupta                         | HM20003527_Ame4    | 86           |
| <b>TOTAL</b>                                                  |                                      |                    | <b>1208</b>  |
